# Supplementary material
Source: publisher figshare collection journal article supplement (https://acs.figshare.com/ndownloader/files/18042650)
Supplement: Supplementary file 1 [file 18042650]

**“Supporting Information”**

**Hierarchical Laser patterned Silver/Graphene Oxide (AgNPs/GO) Hybrid SERS Sensor  
for Explosive Detection**

Tania K. Naqvi<sup>1,2</sup>, Moram Sree Satya Bharati<sup>3</sup>,  
Alok K. Srivastava<sup>4</sup>, Manish M. Kulkarni<sup>1</sup>, Azher M. Siddiqui<sup>2</sup>,  
\*S. Venugopal Rao<sup>3</sup>, \*Prabhat K. Dwivedi<sup>1</sup>

<sup>1</sup>Center for Nanosciences, Indian Institute of Technology Kanpur, India 208016

<sup>2</sup>Department of Physics, Jamia Millia Islamia, New Delhi, India 110025

<sup>3</sup>Advanced Centre of Research in High Energy Materials (ACRHEM),  
University of Hyderabad, Hyderabad, India 500046

<sup>4</sup>Defence Material and Stores Research and Development Establishment,  
Kanpur 208013 India

\*e-mail: soma\_venu@uohyd.ac.in , \*e-mail: prabhatd@iitk.ac.in

## List of contents

Figure S-1 a) AFM image of Ag-Sheet (Ag-S) with rms value, b) AFM image of a line profile over Ag-S, and c) line profile graph showing the surface roughness.

Figure S-2 Raman Mapping of AgNPs/GO substrate ablated at a) 25 $\mu$ J, b) 50 $\mu$ J and c) 100 $\mu$ J.

Figure S-3 a) AFM image of GO b) Height Vs. width graph

Figure S-4 Variation of  $I/I_D$  ratio with concentrations ( $10^{-12}$ ,  $10^{-9}$  and  $10^{-6}$ M) of 2,4-DNT.

Figure S-5 Raman spectra of 2,4-DNT on Ag-NPs/GO substrate ablated at a)25  $\mu$ J, b)50  $\mu$ J and c)100 $\mu$ J.

Table-S-1 Enhancement factors on Ag-S and Ag-S/GO hybrids

Table S-2 Comparison of enhancement factors of various SERS substrates with their enhancement factors.

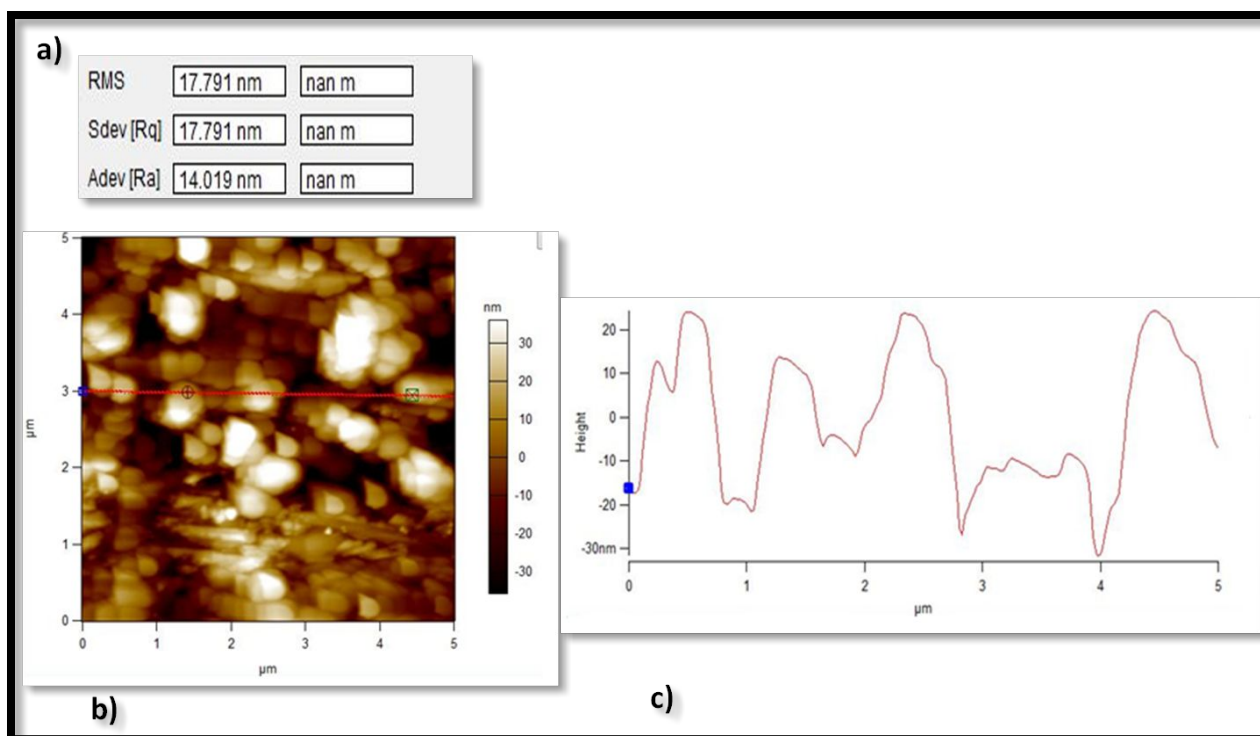

**Figure S-1 a) AFM image of Ag-Sheet (Ag-S) with rms value, b) AFM image of a line profile over Ag-S, and c) Line profile graph showing the surface roughness.**

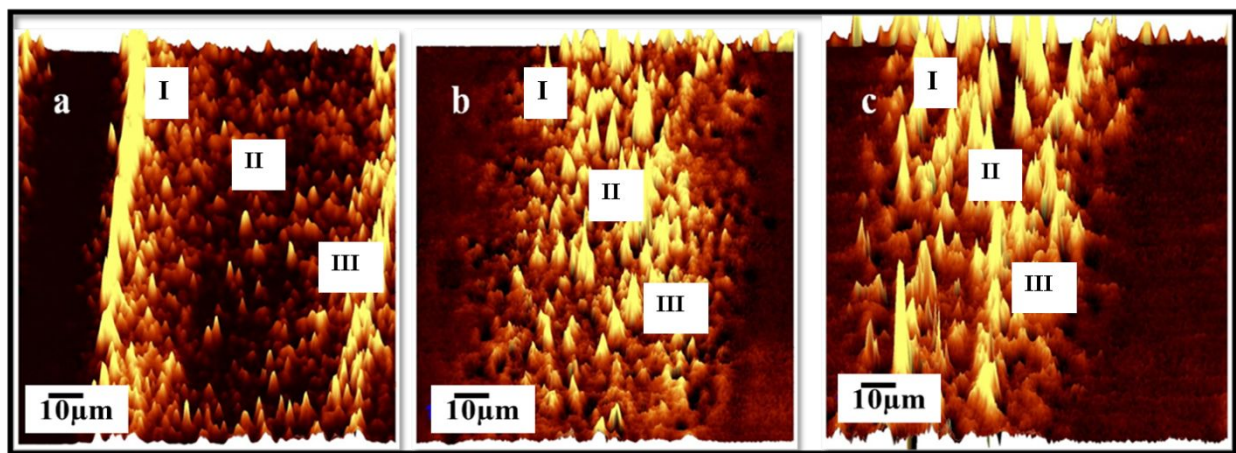

**Figure S-2 Raman Mapping of AgNPs/GO substrate ablated at a) 25 $\mu$ J b) 50 $\mu$ J and c) 100 $\mu$ J.**

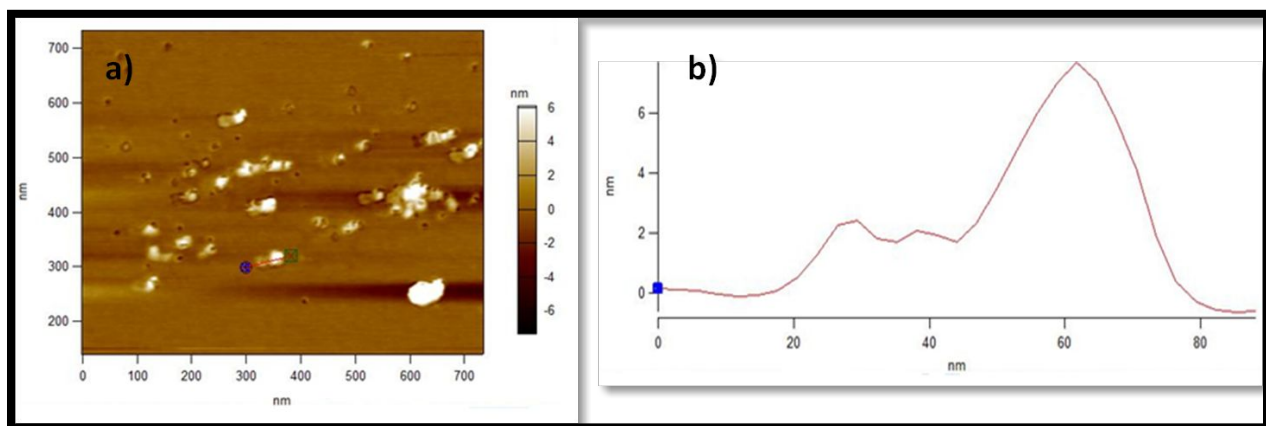

**Figure S-3 a) AFM image of GO b) Height Vs width graph.**

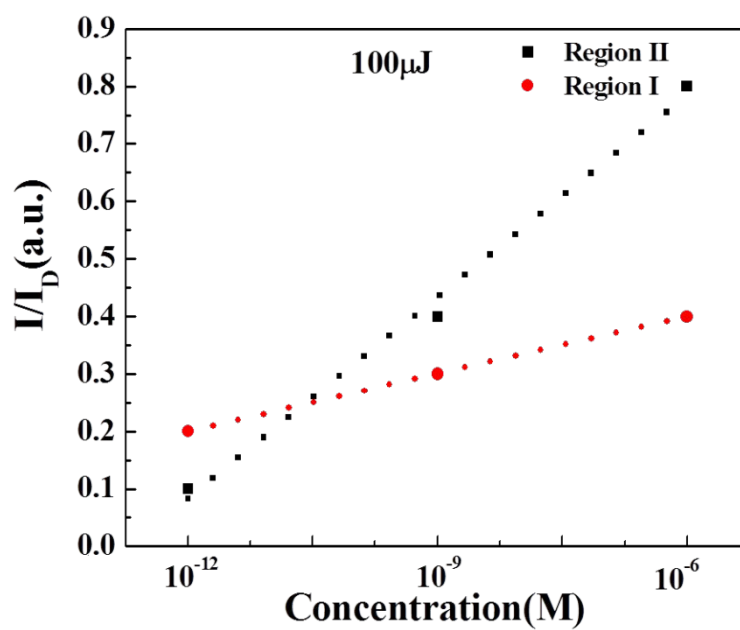

Figure S-4 Variation of  $I/I_D$  ratio with concentrations ( $10^{-12}$ ,  $10^{-9}$  and  $10^{-6}$ M) of 2,4-DNT

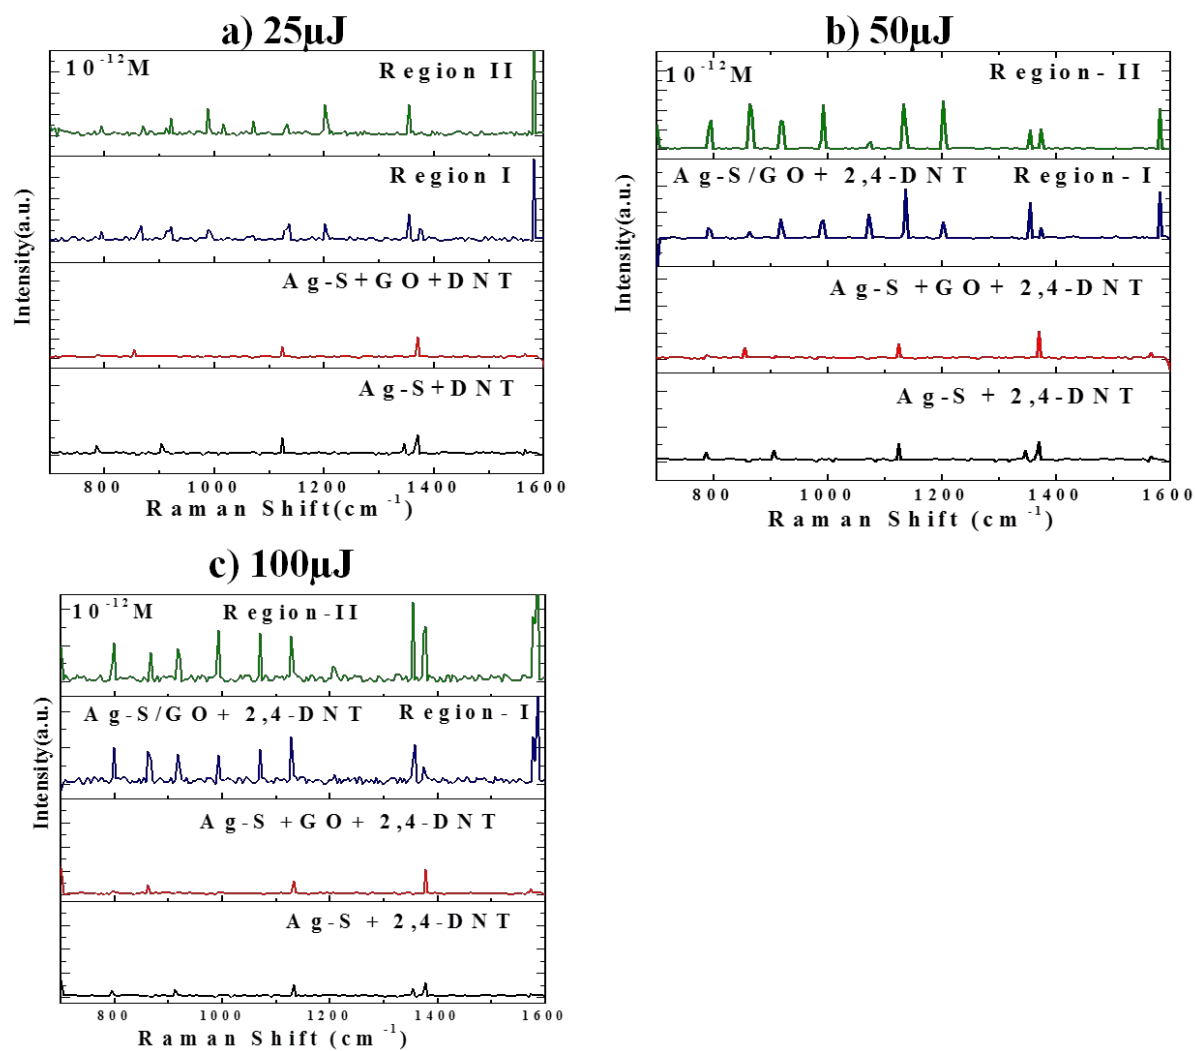

**Figure S-5 Raman spectra of 2,4-DNT on Ag-NPs/GO substrate ablated at a)25  $\mu\text{J}$ , b)50  $\mu\text{J}$  and c)100 $\mu\text{J}$ .**

| S.No. | Substrate       | Enhancement Factor on plain Ag sheet (Region I,II) |                    | Enhancement Factor on Glass slide (Region ,II) |                       |
|-------|-----------------|----------------------------------------------------|--------------------|------------------------------------------------|-----------------------|
|       |                 | I                                                  | II                 | I                                              | II                    |
| 1.    | Ag-S/GO (25μJ)  | $2.74 \times 10^9$                                 | $1.93 \times 10^9$ | $1.10 \times 10^{10}$                          | $2.14 \times 10^{10}$ |
| 2.    | Ag-S/GO (50μJ)  | $5.31 \times 10^9$                                 | $2.47 \times 10^9$ | $2.18 \times 10^{10}$                          | $7.79 \times 10^9$    |
| 3.    | Ag-S/GO (100μJ) | $5.41 \times 10^9$                                 | $5.26 \times 10^9$ | $1.15 \times 10^{10}$                          | $2.12 \times 10^{10}$ |

**Table S-1 Enhancement factors on Ag-S and Ag-S/GO hybrids.**

| S.No. | SERS Substrate                                                                                                                                                                                            | Analyte                    | Enhancement Factor                                                                                                                           | Ref.                 |
|-------|-----------------------------------------------------------------------------------------------------------------------------------------------------------------------------------------------------------|----------------------------|----------------------------------------------------------------------------------------------------------------------------------------------|----------------------|
| 1.    | Ag@Au and Cu@Au alloy nanoparticles (NPs) using the femtosecond laser ablation in liquid                                                                                                                  | 2,4-Dinitrotoluene, (DNT)  | $10^5$                                                                                                                                       | [2]                  |
| 2.    | Ag, Au <sub>20</sub> Ag <sub>80</sub> , Au <sub>30</sub> Ag <sub>70</sub> , Au <sub>50</sub> Ag <sub>50</sub> , Au <sub>70</sub> Ag <sub>30</sub> , and Au <sub>80</sub> Ag <sub>20</sub> and Au NP films | 2, 4-Dinitrotoluene, (DNT) | $2.7 \times 10^6$ , $1.1 \times 10^6$ , $1.83 \times 10^6$ , $9.9 \times 10^5$ , $3.2 \times 10^6$ , $1.34 \times 10^6$ & $1.67 \times 10^6$ | [32]                 |
| 3.    | rGO/Ag NPs substrate                                                                                                                                                                                      | 2, 4-Dinitrotoluene, (DNT) | $10^3$                                                                                                                                       | [50]                 |
| 4.    | Hybridized spherical and triangular gold nanoparticles                                                                                                                                                    | 2, 4-Dinitrotoluene, (DNT) | $2.13 \times 10^7$ and $1.05 \times 10^8$                                                                                                    | [47]                 |
| 5.    | Ag, Ag <sub>0.65</sub> Au <sub>0.35</sub> , Ag <sub>0.5</sub> Au <sub>0.5</sub> , and Ag <sub>0.35</sub> Au <sub>0.65</sub> NSs, respectively                                                             | 2, 4-Dinitrotoluene, (DNT) | $\sim 7 \times 10^5$ , $\sim 1 \times 10^7$ , $\sim 3 \times 10^5$ , and $\sim 1.2 \times 10^6$ .                                            | [48]                 |
| 6.    | Ag-S/GO (25μJ), Ag-S/GO (50μJ) and Ag-S/GO (100μJ).                                                                                                                                                       | 2, 4-Dinitrotoluene, (DNT) | $2.74 \times 10^9$ , $5.31 \times 10^9$ and $5.41 \times 10^9$                                                                               | <b>Present Paper</b> |

**Table S-2** Comparison of enhancement factors of various SERS substrates
